# Supplementary material
Source: PubMed Central journal article supplement (PMC6451063)
Supplement: mmc1.pdf [file mmc1.pdf]

**Biophysical Journal, Volume 116**

**Supplemental Information**

**Structure and Conformation of Wild-Type Bacterial Lipopolysaccharide  
Layers at Air-Water Interfaces**

**Samantha Micciulla, Yuri Gerelli, and Emanuel Schneck**

# Supporting Information for "Structure and conformation of wild-type bacterial lipopolysaccharide monolayers at air/water interfaces"

S. Micciulla, Y. Gerelli, E. Schneck

## Wild-type LPS monolayer stability on $\text{Ca}^{2+}$ -free subphase

Figure S1a shows the pressure versus area isotherms for subsequent compression/expansion cycles of a wild-type LPS monolayer spread onto  $\text{Ca}^{2+}$ -free subphase. Similar to the behavior of this monolayer onto  $\text{Ca}^{2+}$ -loaded subphase reported in the manuscript, there is a clear evidence of hysteresis at each cycle, with a relative reduction of the specific area at the highest pressure ( $\pi = 45$  mN/M) per cycle between  $\approx 3\%$  and  $\approx 8\%$ .

As for  $\text{Ca}^{2+}$ -loaded LPS, the kinetics of the area reduction shows a dependence on the applied lateral pressure (Figure S1b and c): at an initial pressure of  $\pi = 15$  mN/m and constant surface area, the pressure decreases with  $d\Pi/dt \approx 0.04$  mN/(m min), while for initial  $\pi = 30$  mN/m, the pressure decreases about four times as fast ( $d\Pi/dt \approx 0.16$  mN/(m min)).

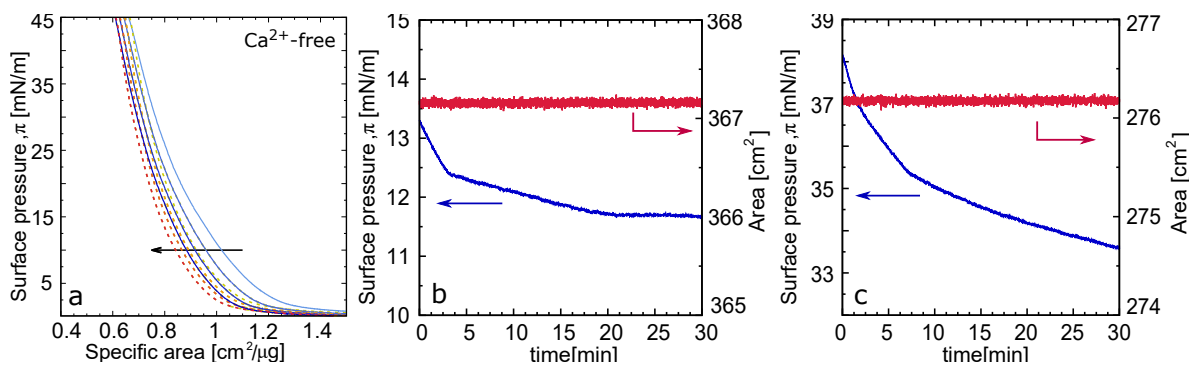

Figure S1: (a): Repeating compression cycles of wild-type LPS monolayers on  $Ca^{2+}$ -free subphase. (b, c): Evolution of surface pressure over time at constant area starting with an initial surface pressure of about 15 mN/m (b) and about 30 mN/m (c).

Table S1: Best-fit parameters obtained from the analysis of the reflectivity data. The roughness  $\sigma$  for the HC refers to the air/HC interface, while the value for IOS refers to the IOS/water interface. The symbols  $n,x$  indicate the different contrasts (neutron and X-ray); the symbols  $f,l$  represent the *free* and *loaded* subphase, respectively.

| Parameter                               | HC                   | IOS                     | OSC                     |
|-----------------------------------------|----------------------|-------------------------|-------------------------|
| $\rho_{i,f}^{n,D_2O} [\text{\AA}^{-2}]$ | $0.4 \times 10^{-6}$ | $2.60 \times 10^{-6}$   | $2.16 \times 10^{-6}$   |
| $\rho_{i,l}^{n,D_2O} [\text{\AA}^{-2}]$ | $0.4 \times 10^{-6}$ | $2.56 \times 10^{-6}$   | $2.12 \times 10^{-6}$   |
| $\rho_{i,f}^{n,ACMW} [\text{\AA}^{-2}]$ | $0.4 \times 10^{-6}$ | $-0.041 \times 10^{-6}$ | $-0.034 \times 10^{-6}$ |
| $\rho_{i,l}^{n,ACMW} [\text{\AA}^{-2}]$ | $0.4 \times 10^{-6}$ | $-0.139 \times 10^{-6}$ | $-0.011 \times 10^{-6}$ |
| $\rho_i^x [\text{\AA}^{-2}]$            | $8.0 \times 10^{-6}$ | $15.2 \times 10^{-6}$   | $14.2 \times 10^{-6}$   |
| $d_f [\text{\AA}]$                      | 20 (1)               | 20 (1)                  | -                       |
| $d_l [\text{\AA}]$                      | 15 (1)               | 17 (2)                  | -                       |
| $\lambda_f [\text{\AA}]$                | -                    | -                       | 119 (10)                |
| $\lambda_l [\text{\AA}]$                | -                    | -                       | 130 (10)                |
| $n_f$                                   | -                    | -                       | 1.4 (0.1)               |
| $n_l$                                   | -                    | -                       | 1.3 (0.1)               |
| $\sigma_f [\text{\AA}]$                 | 3 (1)                | 7 (2)                   | -                       |
| $\sigma_l [\text{\AA}]$                 | 3 (1)                | 14 (2)                  | -                       |
